# Supplementary material for: Colorimetric and near infrared fluorescent detection of cyanide by a new phenanthroimidazole–indolium conjugated probe
Source: Royal Society of Chemistry journal article supplement (doi:10.1039/c4ra00206g), 2014-01-01
Supplement: c4ra00206g1.pdf [file c4ra00206g1.pdf]

## Supplementary Information for

# Colorimetric and near infrared fluorescent detection of cyanide by a new phenanthroimidazole–indolium conjugated probe

Yi Zhang,<sup>‡</sup> Dehuan Yu,<sup>‡</sup> and Guoqiang Feng\*

*Key Laboratory of Pesticide and Chemical Biology of Ministry of Education, College of Chemistry, Central China Normal University, Wuhan 430079, P.R. China,*

[gf256@mail.ccnu.edu.cn](mailto:gf256@mail.ccnu.edu.cn)

### Table of contents:

|                                                                                            |        |
|--------------------------------------------------------------------------------------------|--------|
| 1. Determination of the fluorescence quantum yield                                         | Page 2 |
| 2. Additional data for sensing cyanide by probe 1                                          | Page 2 |
| 3. Enlarged <sup>1</sup> H NMR spectra changes of probe 1 with addition of CN <sup>-</sup> | Page 5 |
| 4. Structure characterizations for the isolated 1-CN adduct                                | Page 6 |
| 5. Structure characterizations for probe 1                                                 | Page 7 |

## 1. Determination of the fluorescence quantum yield

The fluorescence quantum yields of probe **1** ( $\Phi = 0.014$ ) and **1-CN** adduct ( $\Phi = 0.034$ ) were determined in Tris·HCl buffer (10 mM, pH = 9.3, containing 50% MeOH, v/v) at 25°C, using quinine sulfate ( $\Phi_f = 0.58$  in 1N H<sub>2</sub>SO<sub>4</sub>) as standard. The quantum yield was calculated using the following equation:

$$\Phi_x = \Phi_s (A_s F_x / A_x F_s) (n_x^2 / n_s^2)$$

where,  $A_x$  and  $A_s$  are the absorbance of the sample and the reference, respectively, at the same excitation wavelength,  $F_x$  and  $F_s$  are the corresponding relative integrated fluorescence intensities, and  $n$  is the refractive index of the solvent.

## 2. Additional data for sensing cyanide by probe 1

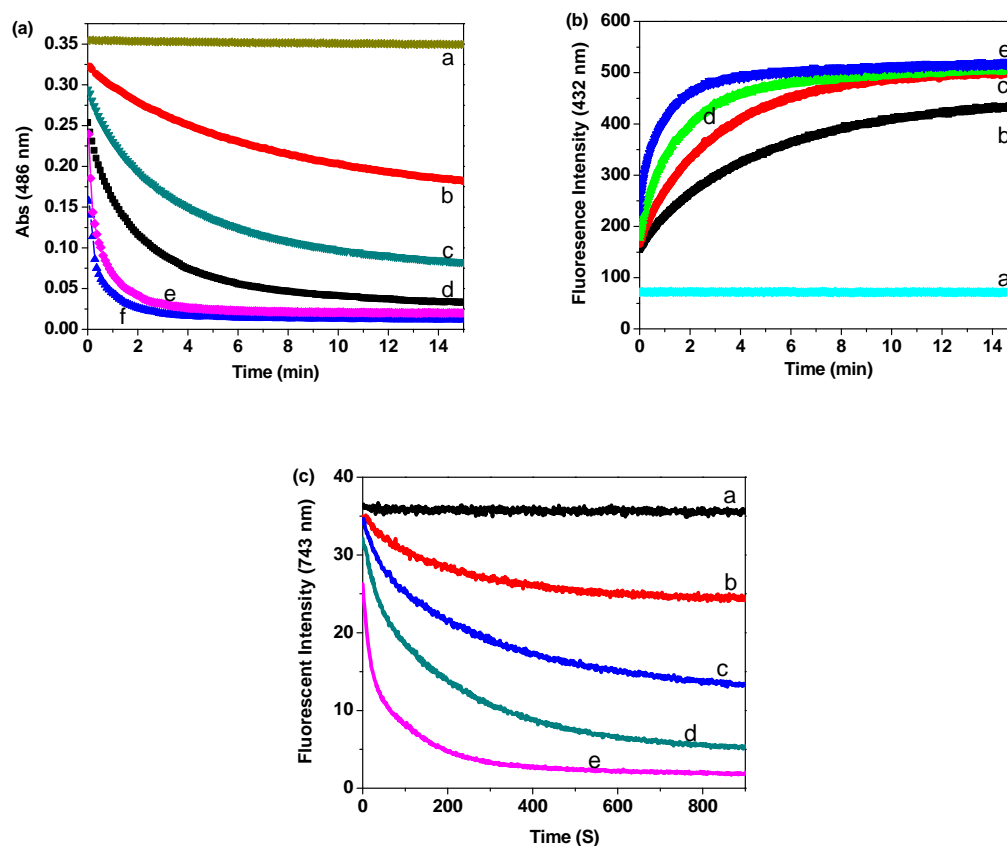

**Fig. S1** (a) UV-vis kinetics of probe **1** (20 μM) monitored at 486 nm with different concentration of CN<sup>-</sup> (a. 0 μM, b. 10 μM, c. 20 μM, d. 40 μM, e. 100 μM, f. 200 μM). (b) Fluorescent kinetics of probe **1** (20 μM) monitored at 432 nm ( $\lambda_{\text{ex}}$ : 380 nm) with different concentration of CN<sup>-</sup> (a. 0 μM, b. 20 μM, c. 40 μM, d. 100 μM, e. 200 μM). (c) Fluorescent kinetics of probe **1** (20 μM) monitored at 743 nm ( $\lambda_{\text{ex}}$ : 480 nm) with different concentration of CN<sup>-</sup> (a. 0 μM, b. 10 μM, c. 20 μM, d. 40 μM, e. 100 μM). All reactions were investigated in MeOH–Tris·HCl buffer (10 mM, pH = 9.3, 1 : 1, v/v) at 25 °C.

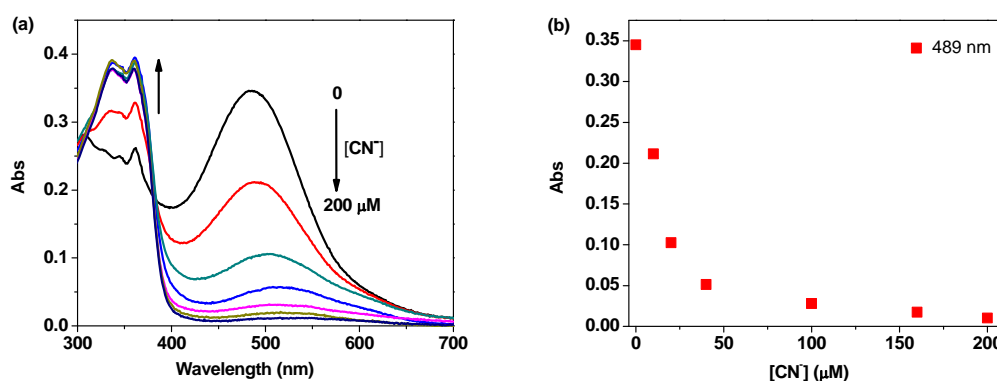

**Fig. S2** (a) UV-vis spectra of probe **1** (20  $\mu\text{M}$ ) upon addition of 0, 10, 20, 40, 100, 160, 200  $\mu\text{M}$   $\text{CN}^-$  in MeOH-Tris-HCl buffer (10 mM, pH = 9.3, 1 : 1, v/v) at 25°C. (b) The absorbance intensity changes of probe **1** at 489 nm as a function of  $\text{CN}^-$  concentrations. Each spectrum were recorded 10 min after the addition of  $\text{CN}^-$ .

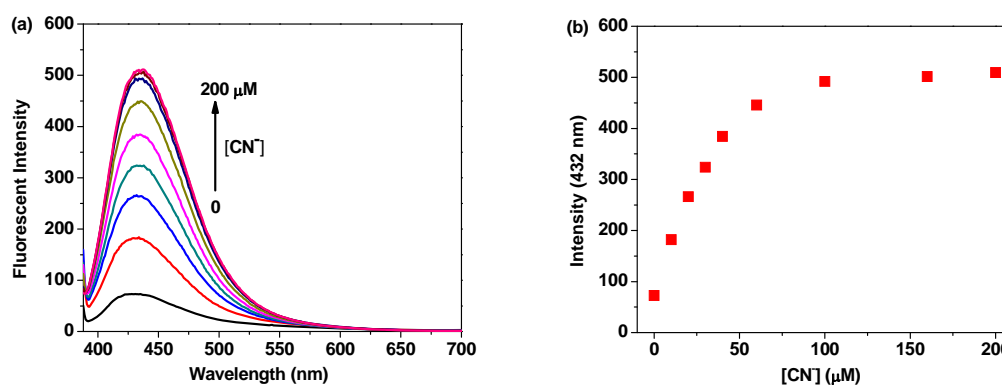

**Fig. S3** (a) Fluorescence spectra changes of probe **1** (20  $\mu\text{M}$ ) upon addition of 0, 10, 20, 30, 40, 60, 100, 160, 200  $\mu\text{M}$  of  $\text{CN}^-$  in MeOH-Tris-HCl buffer (10 mM, pH = 9.3, 1 : 1, v/v) at 25 °C. (b) Fluorescence intensity changes of probe **1** at 432 nm against  $[\text{CN}^-]$  from 0-200  $\mu\text{M}$ . Spectra data were recorded 10 min after the addition of  $\text{CN}^-$  with  $\lambda_{\text{ex}} = 380$  nm,  $d_{\text{ex}} = 5$  nm,  $d_{\text{em}} = 10$  nm.

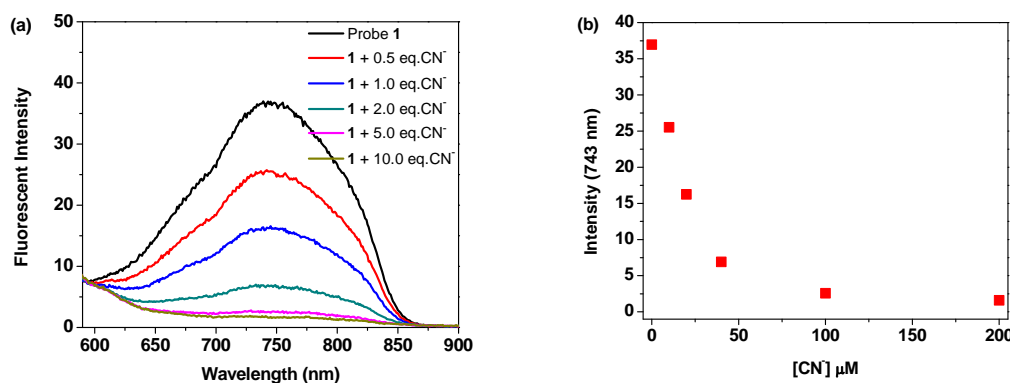

**Fig. S4** (a) Fluorescence spectra changes of probe **1** (20  $\mu\text{M}$ ) upon addition of 0, 10, 20, 40, 100, 200  $\mu\text{M}$  of  $\text{CN}^-$  in MeOH-Tris-HCl buffer (10 mM, pH = 9.3, 1 : 1, v/v) at 25 °C. (b) Fluorescence intensity changes of probe **1** at 743 nm against  $[\text{CN}^-]$  from 0-200  $\mu\text{M}$ . Spectra data were recorded 10 min after the addition of  $\text{CN}^-$  with  $\lambda_{\text{ex}} = 380$  nm,  $d_{\text{ex}} = 5$  nm,  $d_{\text{em}} = 10$  nm.

200  $\mu\text{M}$   $\text{CN}^-$  in MeOH-Tris-HCl buffer (10 mM, pH = 9.3, 1 : 1, v/v) at 25  $^\circ\text{C}$ . (b) Fluorescence intensity changes of probe **1** at 743 nm against  $[\text{CN}^-]$  from 0-200  $\mu\text{M}$ . Spectra data were recorded 10 min after the addition of  $\text{CN}^-$  with  $\lambda_{\text{ex}} = 480$  nm,  $d_{\text{ex}} = 10$  nm,  $d_{\text{em}} = 10$  nm.

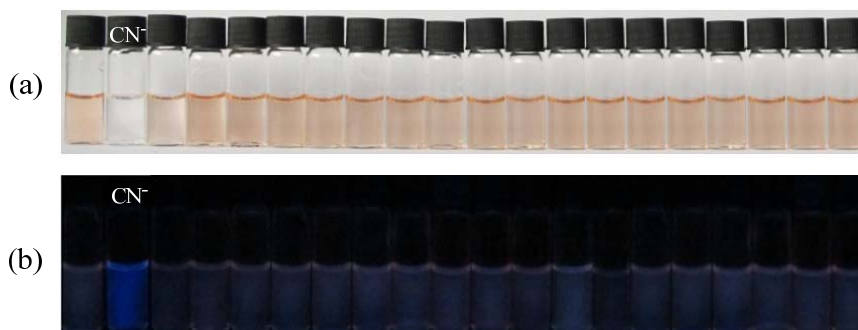

**Fig. S5** (a) Color changes and (b) fluorescence color changes under a 365 nm UV light of probe **1** (20  $\mu\text{M}$ ) with 100  $\mu\text{M}$  of different anions (from left to right: none,  $\text{CN}^-$ ,  $\text{S}^{2-}$ , Cys,  $\text{F}^-$ ,  $\text{I}^-$ ,  $\text{SCN}^-$ ,  $\text{SO}_4^{2-}$ ,  $\text{NO}_3^-$ ,  $\text{HSO}_4^-$ ,  $\text{N}_3^-$ ,  $\text{Cl}^-$ ,  $\text{NO}_2^-$ ,  $\text{Br}^-$ ,  $\text{N}_3^-$ ,  $\text{H}_2\text{PO}_4^-$ ,  $\text{HCO}_3^-$ ,  $\text{PO}_4^{3-}$ ,  $\text{CO}_3^{2-}$  and  $\text{ClO}_4^-$  MeOH-Tris-HCl buffer (10 mM, pH = 9.3, 1 : 1, v/v) at room temperature.

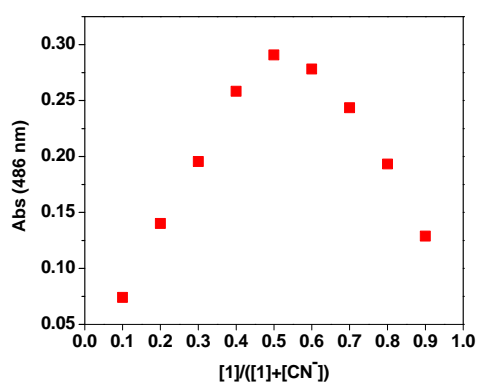

**Fig. S6** Job's plot examined between probe **1** and  $\text{CN}^-$ . Total concentration of **1** +  $\text{CN}^-$  was kept constant at 50  $\mu\text{M}$ .

### 3. Enlarged $^1\text{H}$ NMR spectra changes of probe 1 with addition of $\text{CN}^-$

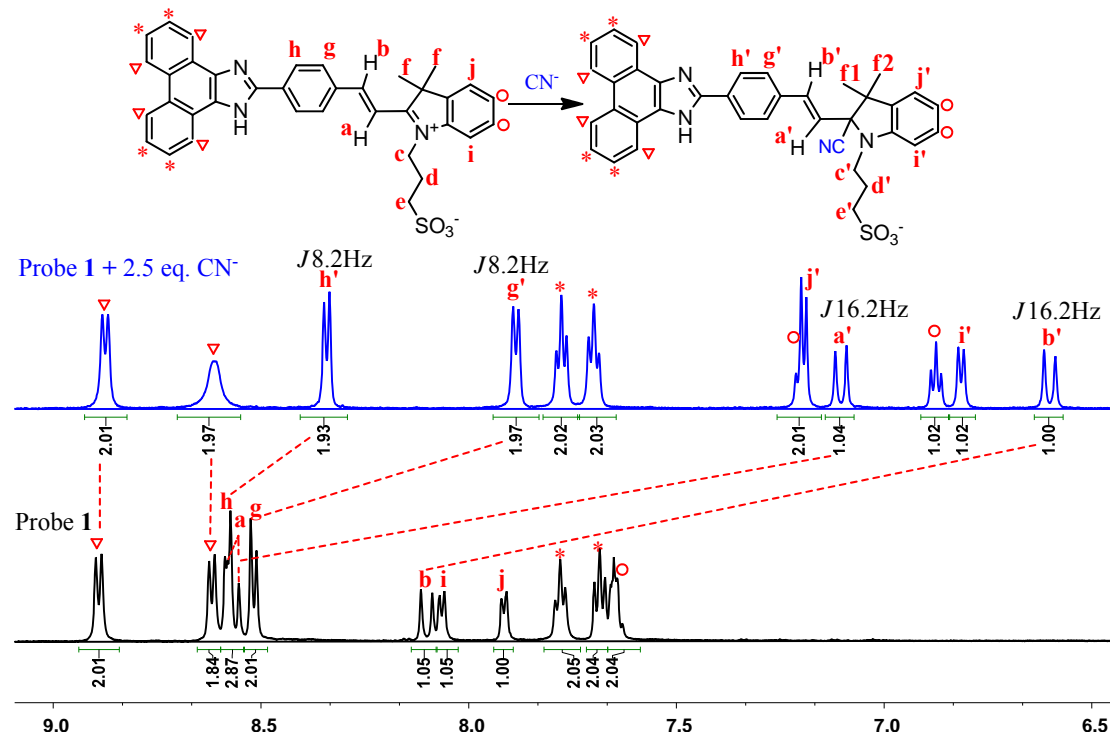

(1) Aromatic protons signal change of probe 1 with addition of  $\text{CN}^-$

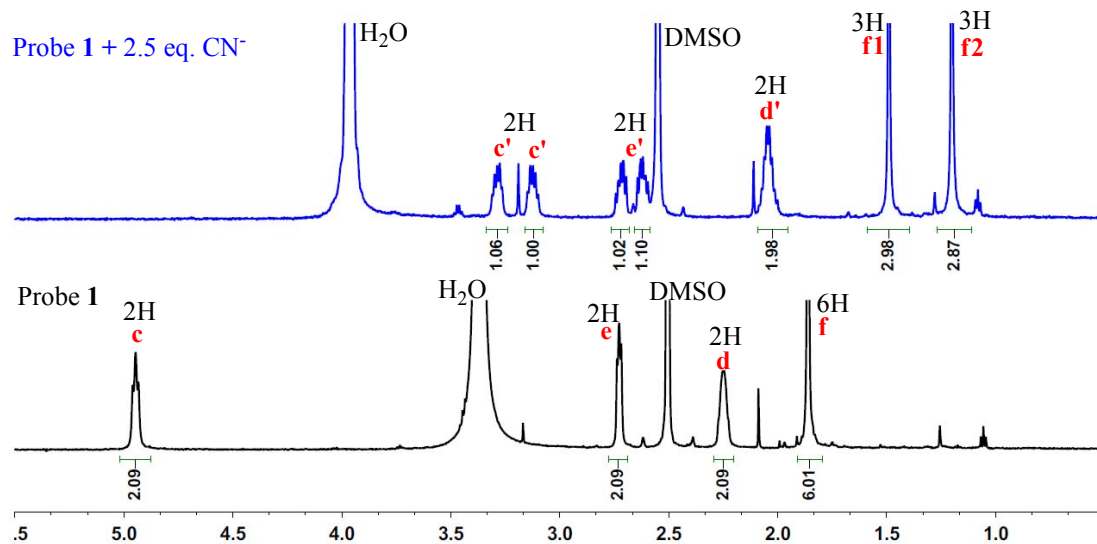

(2) Aliphatic protons signal change of probe 1 with addition of  $\text{CN}^-$

**Fig S7.** Enlarged  $^1\text{H}$  NMR (600 MHz) spectra changes of probe 1 with addition of  $\text{CN}^-$ .

#### 4. Structure characterizations for the isolated 1-CN adduct

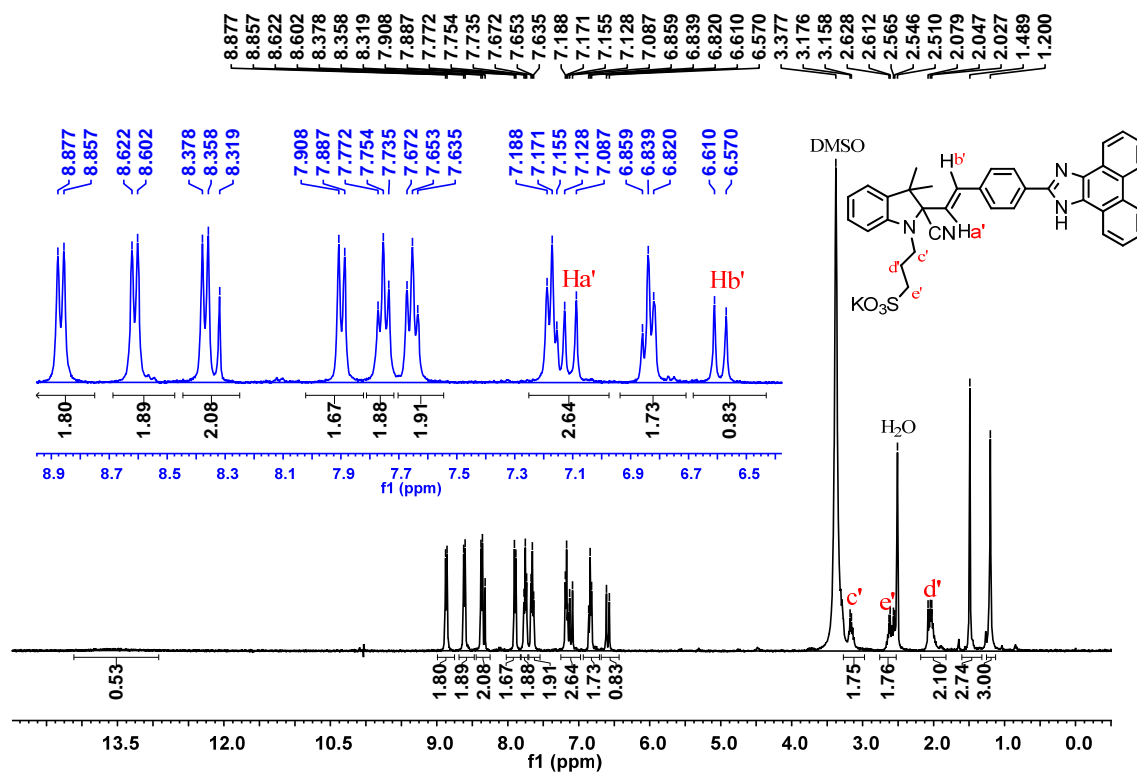

Fig. S8  $^1\text{H}$  NMR spectrum of the isolated probe 1-CN adduct in DMSO- $d_6$  (400 MHz)

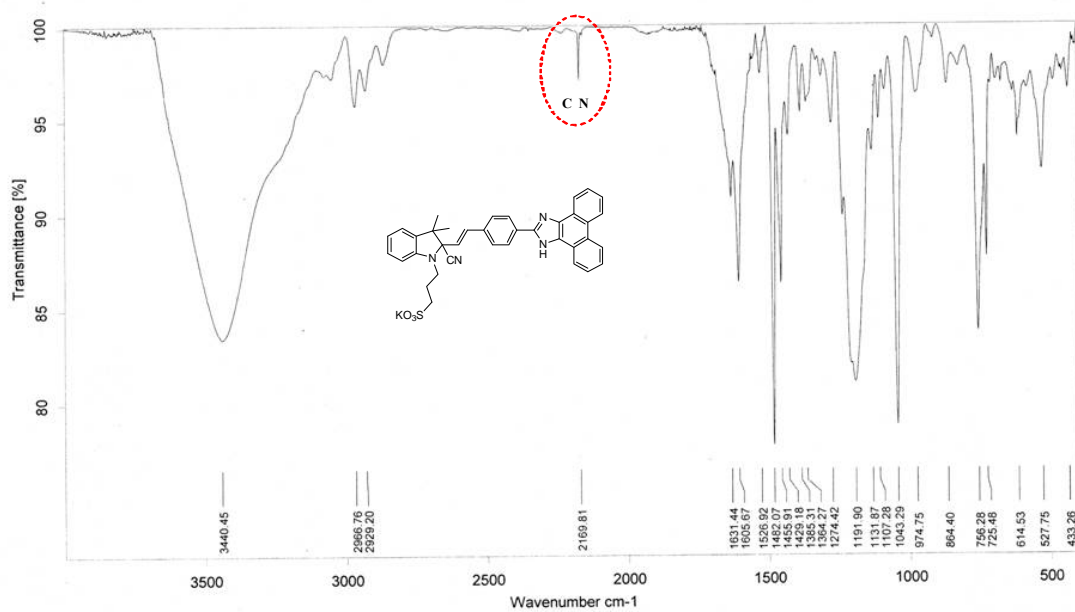

Fig. S9 IR spectrum of the probe 1-CN adduct

ZY-24-CN #824 RT: 5.35 AV: 1 SB: 659 0.71-4.25, 5.63-6.33 NL: 5.90E3  
T: +c Full.ms [40.00-700.00]

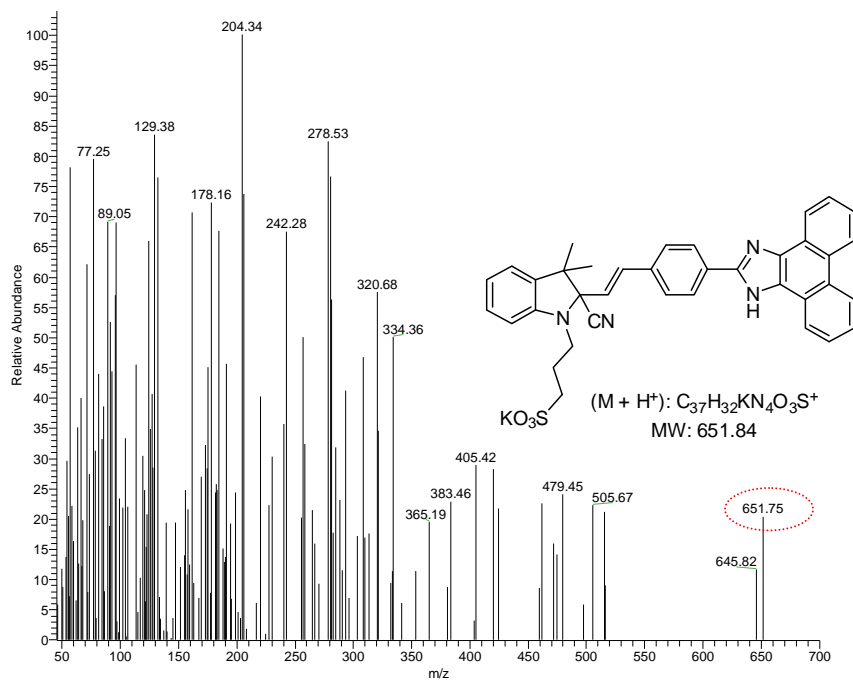

Fig. S10 EI-MS of 1-CN adduct.

## 5. Structure characterizations for probe 1

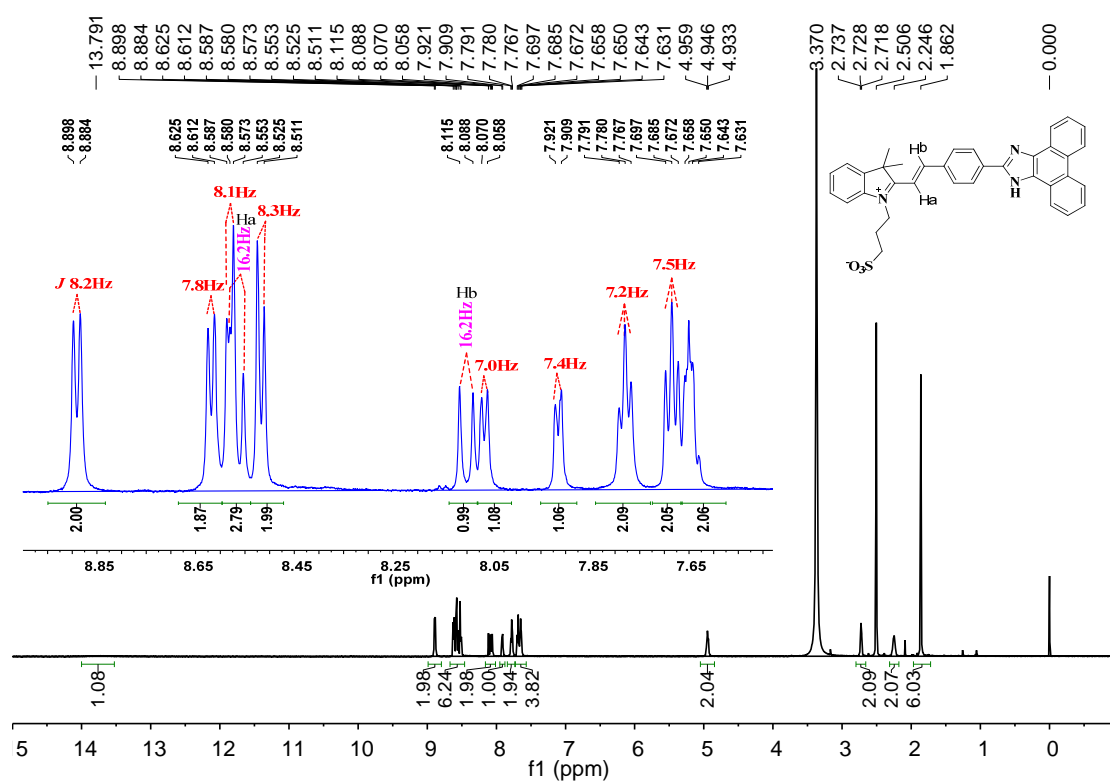

Fig. S11 <sup>1</sup>H NMR spectrum of probe 1 in DMSO-d<sub>6</sub> (600 MHz);

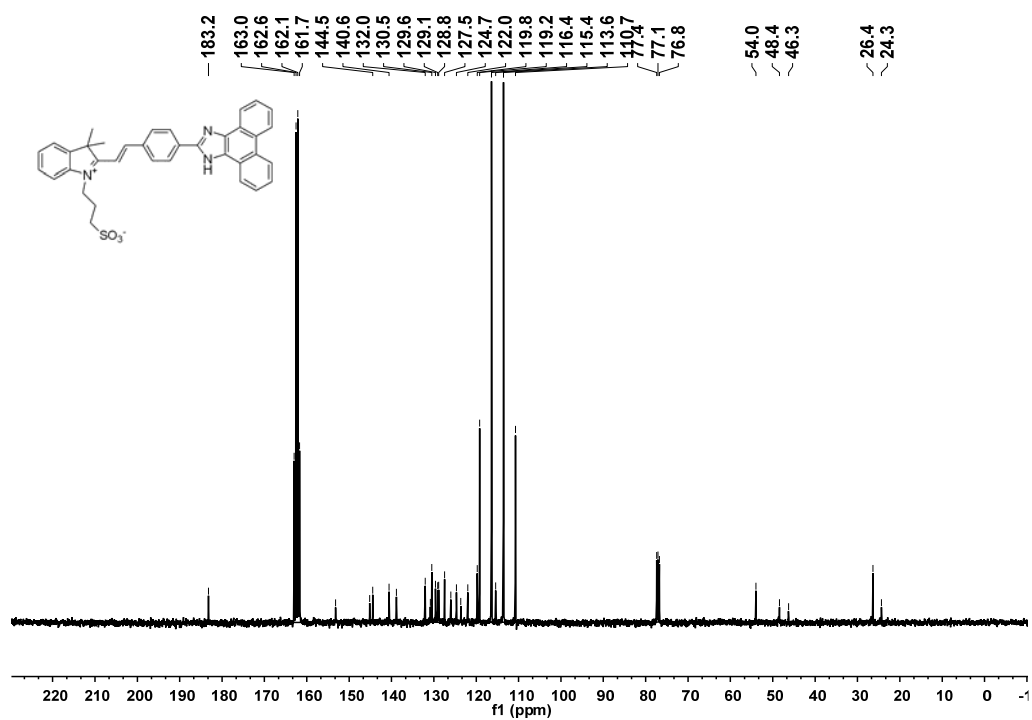

**Fig. S12**  $^{13}\text{C}$  NMR spectrum of probe 1 in a mixture of  $\text{CF}_3\text{COOD}$  and  $\text{CDCl}_3$

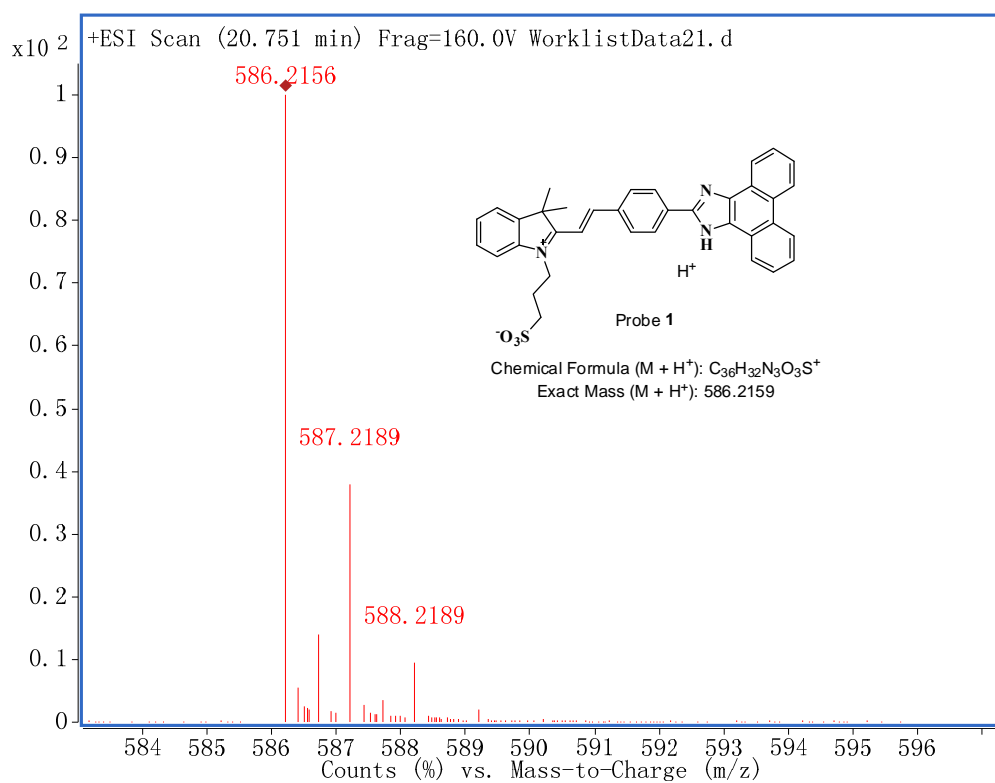

**Fig. S13** HR-MS spectrum of probe 1



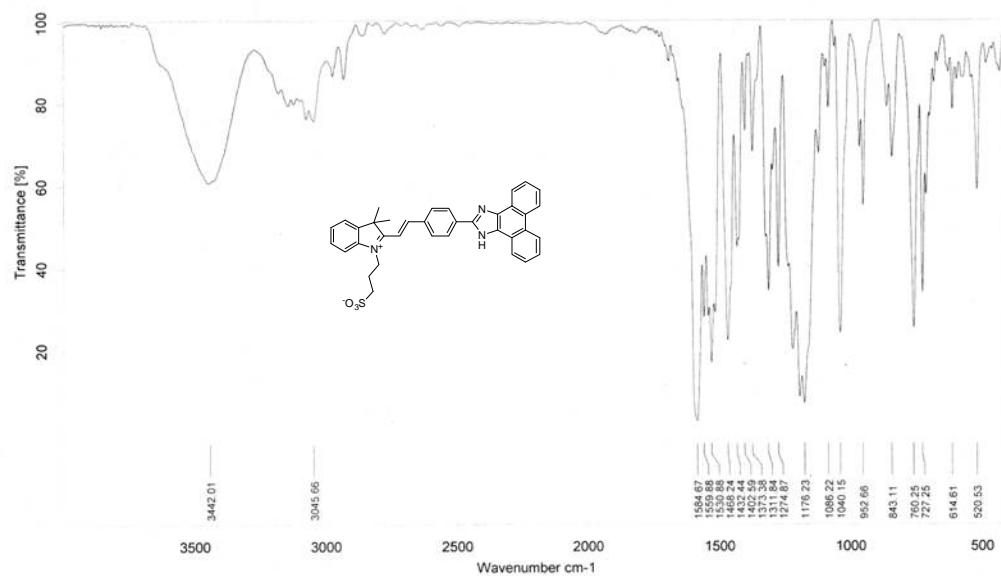

**Fig. S14** IR spectrum of probe **1**
